# Supplementary material
Source: publisher figshare collection journal article supplement (https://brill.figshare.com/ndownloader/files/20160464)
Supplement: Supplementary file 1 [file 20160464]

Short Note

In-situ severe breeding habitat intervention only achieves  
temporary success in reducing *Batrachochytrium dendrobatidis*  
infection

Andrés Fernández-Loras<sup>1</sup>, Luz Boyero<sup>2,3</sup>, Jaime Bosch<sup>1,4,\*</sup>

1 - Museo Nacional de Ciencias Naturales-CSIC, José Gutiérrez Abascal 2, 28006 Madrid, Spain

2 - Faculty of Science and Technology, University of the Basque Country (UPV/EHU), Vizcaya, Spain

3 - IKERBASQUE, Basque Foundation for Science, Bilbao, Spain

4 - Research Unit of Biodiversity (CSIC, UO, PA), Oviedo University, Mieres, Spain

\*Corresponding author; e-mail: [bosch@mncn.csic.es](mailto:bosch@mncn.csic.es)

**Supplementary material**

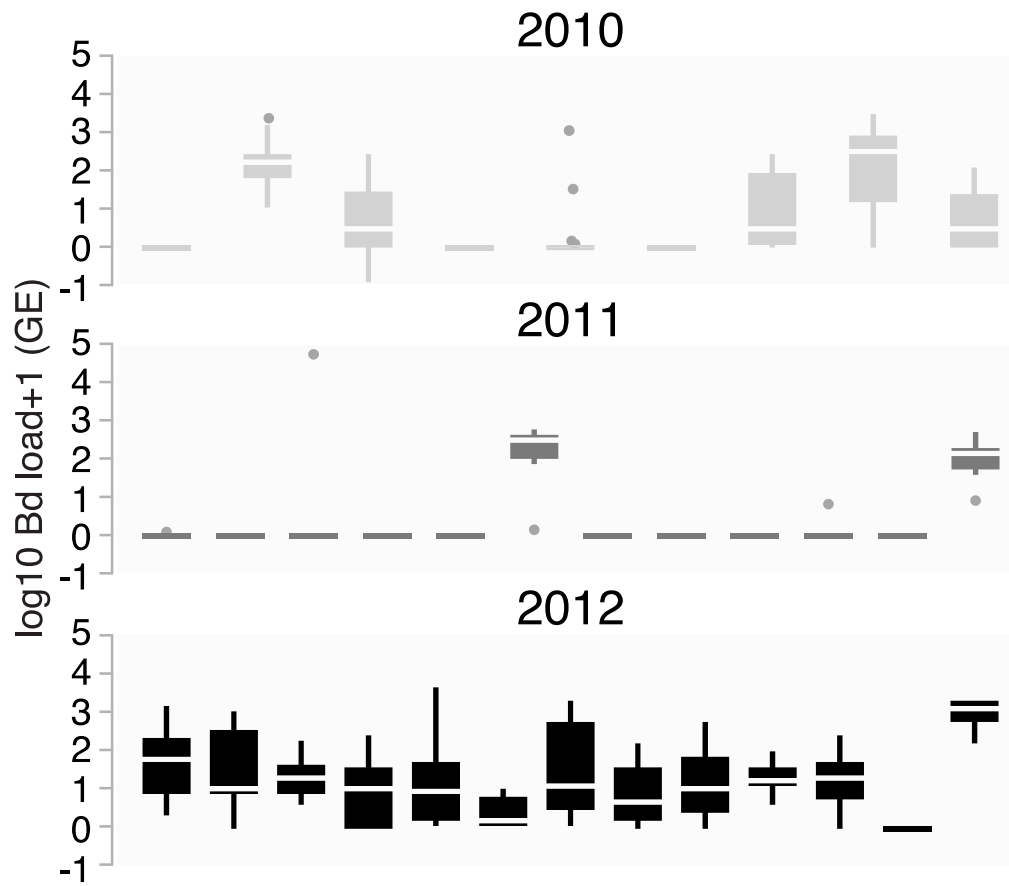

**Figure S1.** Box plots of *Bd* load ( $\log_{10} x+1$  transformed) of overwintering *Alytes obstetricans* larvae at different breeding sites sampled in 2010, 2011 and 2012 before habitat intervention.

**Table S1.** Tukey's post-hoc tests comparing pairs of means of *Bd* loads for the treatment by year interaction. Letters not connected by the same letter are significantly different.

| Level         |                 | Least Sq Mean |
|---------------|-----------------|---------------|
| REMOVAL, 2015 | A               | 3.764         |
| REMOVAL, 2013 | A B             | 3.314         |
| FENCING, 2015 | B C             | 2.309         |
| FENCING, 2014 | C D             | 1.905         |
| DRYING, 2012  | C D E           | 1.523         |
| CONTROL, 2012 | C D E           | 1.395         |
| REMOVAL, 2012 | C D E F         | 1.296         |
| CONTROL, 2014 | C D E F G       | 1.161         |
| CONTROL, 2015 | A B C D E F G H |               |
| DRYING, 2015  | D E F G         | 1.116         |
| REMOVAL, 2014 | C D E F G       | 1.107         |
| FENCING, 2012 | E F G           | 0.915         |
| CONTROL, 2013 | F G H           | 0.429         |
| FENCING, 2013 | G H             | 0.2876        |
| DRYING, 2014  | H               | 3.442e-15     |
| DRYING, 2013  | H               | -5.898e-16    |

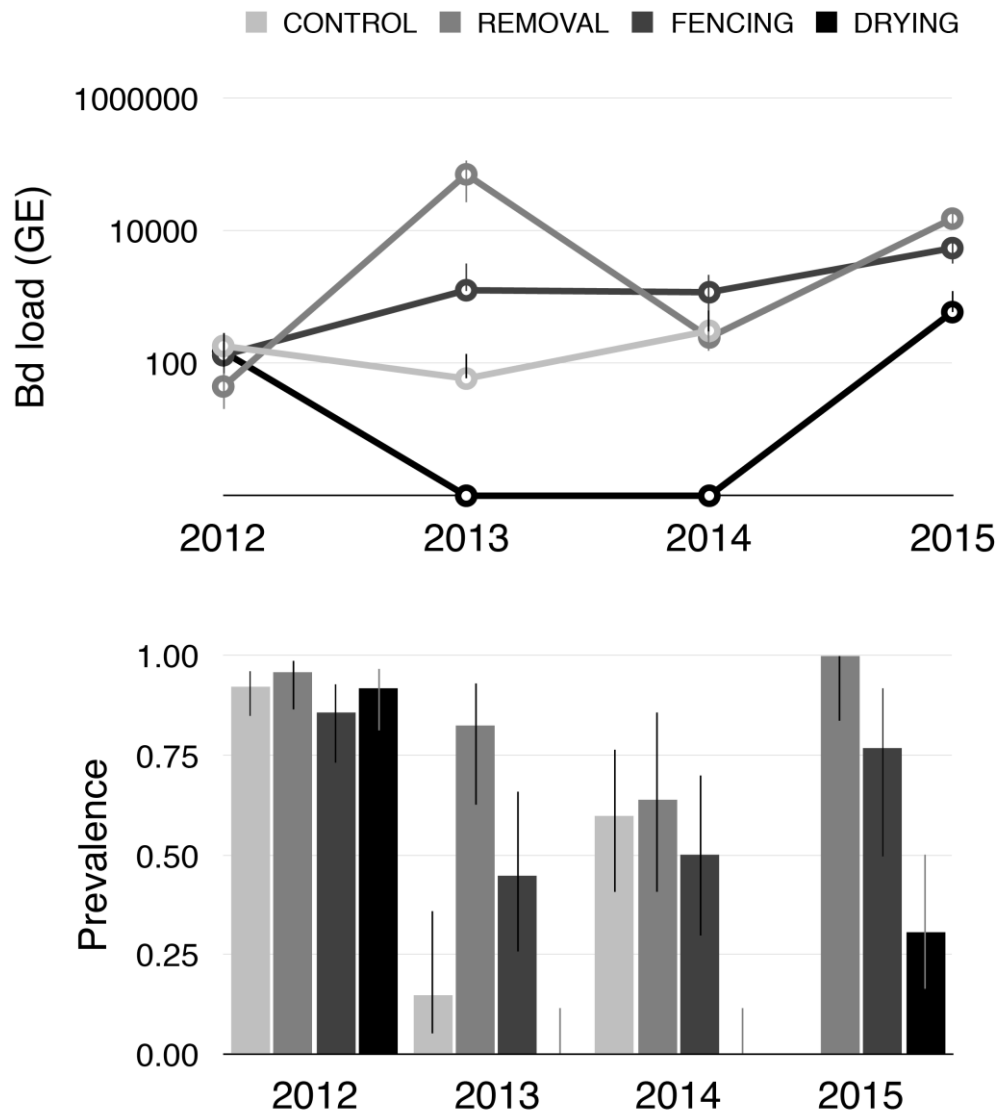

**Figure S2.** *Bd* load (logarithmic scale) and prevalence of infection (mean  $\pm$  95% CI) across the four experimental groups (control, before (2012) and after habitat intervention (2013–2015)). There is no data from the control group in 2015 because no overwintering larvae were found.
